# Supplementary material
Source: publisher figshare collection journal article supplement (https://tandf.figshare.com/articles/dataset/_/19768410)
Supplement: Supplementary file 1 [file 1]

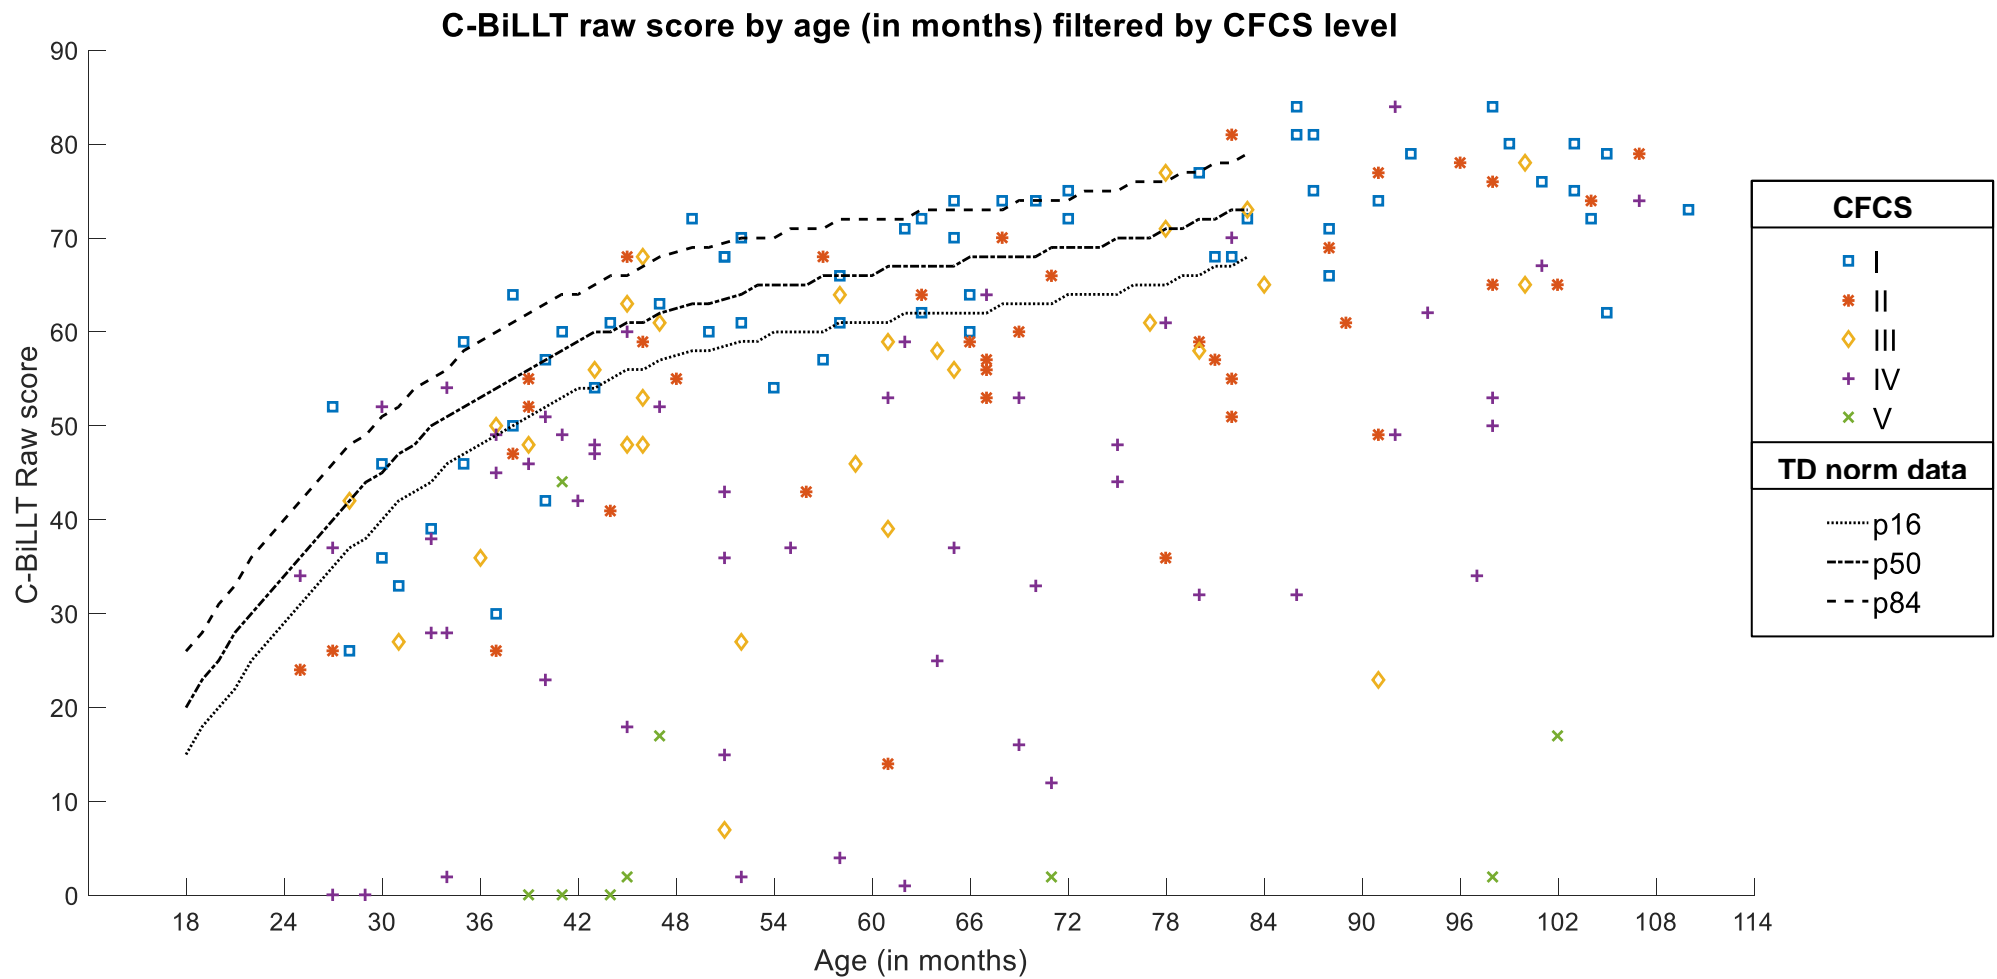

Figure 2s. C-BiLLT raw score by age in months, filtered by CFCS level

Figure 2s Alt Text: Grouped scatterplot with on the y-axis C-BiLLT raw score (from 0 to 90, intervals of 10 points) and on the x-axis age in months (from 18 to 114, intervals of 6 months). TD norm data is showed with line graphs (up to the age of 84 months); the upper line is representing percentile 84, the middle line is representing percentile 50, and the lowest line is representing percentile 16. Scatters are grouped following the CFCS level; level I is represented by a blue square, level II is represented by a red asterisk, level III is represented by a yellow diamond, level IV is represented by a purple plus, and level V is represented by a green multiplication sign.
