# Supplementary material
Source: publisher figshare collection journal article supplement (https://tandf.figshare.com/articles/dataset/_/19768410)
Supplement: Supplementary file 3 [file 1]

Archive with 3 entries (3 files):
- idre_a_2072960_sm8351.pdf
- idre_a_2072960_sm8350.pdf
- idre_a_2072960_sm8349.pdf
