# Supplementary material
Source: publisher figshare collection journal article supplement (https://tandf.figshare.com/articles/dataset/_/19768410)
Supplement: Supplementary file 3 [file 1 › idre_a_2072960_sm8349.pdf]

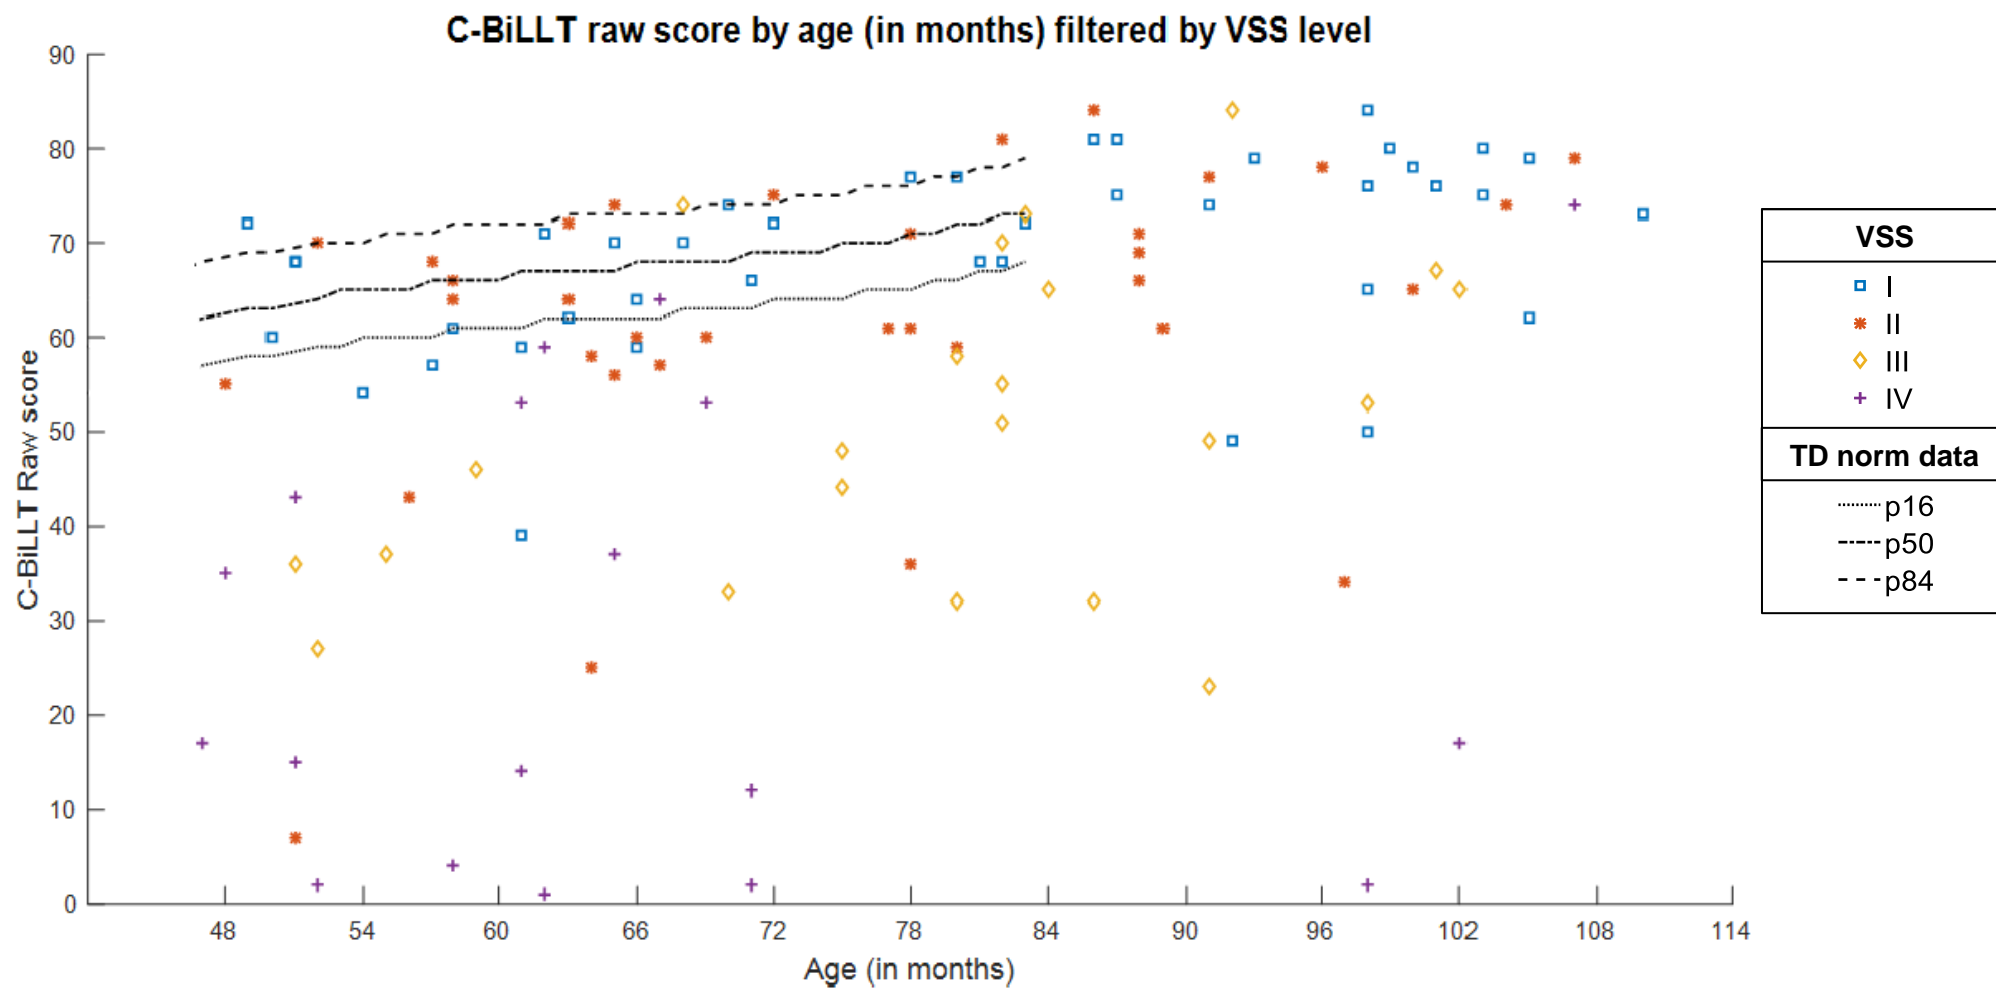

Figure 1s. C-BiLLT raw score by age in months, filtered by VSS level

Figure 1s Alt Text: Grouped scatterplot with on the y-axis C-BiLLT raw score (from 0 to 90, intervals of 10 points) and on the x-axis age in months (from 48 to 114, intervals of 6 months). TD norm data is showed with line graphs (up to the age of 84 months); the upper line is representing percentile 84, the middle line is representing percentile 50, and the lowest line is representing percentile 16. Scatters are grouped following the VSS level; level I is represented by a blue square, level II is represented by a red asterisk, level III is represented by a yellow diamond, and level IV is represented by a purple plus.
